# Supplementary material for: A novel antimicrobial technology to enhance food safety and quality of leafy vegetables using engineered water nanostructures
Source: Royal Society of Chemistry journal article supplement (doi:10.1039/d0en00814a), 2020-12-23
Supplement: d0en00814a1.pdf [file d0en00814a1.pdf]

## **A Novel Antimicrobial Technology to Enhance Food Safety and Quality of Leafy Vegetables using Engineered Water Nanostructures**

Runze Huang<sup>a‡\$</sup>, Nachiket Vaze<sup>a‡</sup>, Anand Soorneedi<sup>b</sup>, Matthew D. Moore<sup>b</sup>, Yaguang Luo<sup>c</sup>, Elena Poverenov<sup>d</sup>, Victor Rodov<sup>d</sup>, Philip Demokritou<sup>a,\*</sup>

<sup>a</sup> Center for Nanotechnology and Nanotoxicology, Department of Environmental Health, Harvard T. H. Chan School of Public Health, Harvard University, Boston, MA, 02115, USA

<sup>b</sup> Department of Food Science, University of Massachusetts Amherst, Amherst, MA, 01003, USA

<sup>c</sup> Environmental Microbial and Food Safety Laboratory, U. S. Department of Agriculture, Agricultural Research Service, Beltsville Agricultural Research Center, Beltsville, MD, 20705, USA

<sup>d</sup> Institute of Postharvest and Food Sciences, Agricultural Research Organization, The Volcani Center, Rishon LeZion, 7528809, Israel

**\*Corresponding author:** Philip Demokritou ([pdemokri@hsph.harvard.edu](mailto:pdemokri@hsph.harvard.edu)); 665 Huntington Avenue, Building 1, Room 1310B, Boston, MA 02115, USA

**‡** These authors contributed equally   **\$** Posthumous credit

## **Table of Contents**

**Fig. S1** Inactivation of *E. coli* on stainless steel coupons from various EWNS based nano-sanitizers synthesized with single and combined active ingredients.

**Fig. S2** Inactivation of various microorganisms on stainless steel coupon from EWNS based nano-sanitizers synthesized with a combination of AIs (10% hydrogen peroxide, 1% citric acid, 0.1% lysozyme and 0.0025% nisin).

**Table S1.** Physio-chemical characterization of the EWNS based nano-sanitizer synthesized with 10% hydrogen peroxide, 1% citric acid, 0.1% lysozyme and 0.0025% nisin.

**Fig. S1 Inactivation of *E. coli* on stainless steel coupons from various EWNS based nano-sanitizers synthesized with (a) single and (b) combined active ingredients.** Microorganisms were inoculated on stainless steel coupon and exposed to the EWNS based nano-sanitizers synthesized with various single and combined active ingredients. The coupon was inoculated with  $\sim 10^6$  CFU/coupon of *E. coli*. The coupons were then exposed to the EWNS based nano-sanitizers for 30 s as shown in Fig. 1. The temperature and relative humidity were  $\sim 24$  °C and  $\sim 40\%$ , respectively. The error bar represents 1 standard deviation. (Contains data adapted with permission from Huang, R., Vaze, N., Soorneedi, A., Moore, M. D., Xue, Y., Bello, D., & Demokritou, P. (2019). Inactivation of Hand Hygiene-Related Pathogens Using Engineered Water Nanostructures. ACS Sustainable Chemistry & Engineering, 7(24), 19761-19769. Copyright 2019, American Chemical Society).

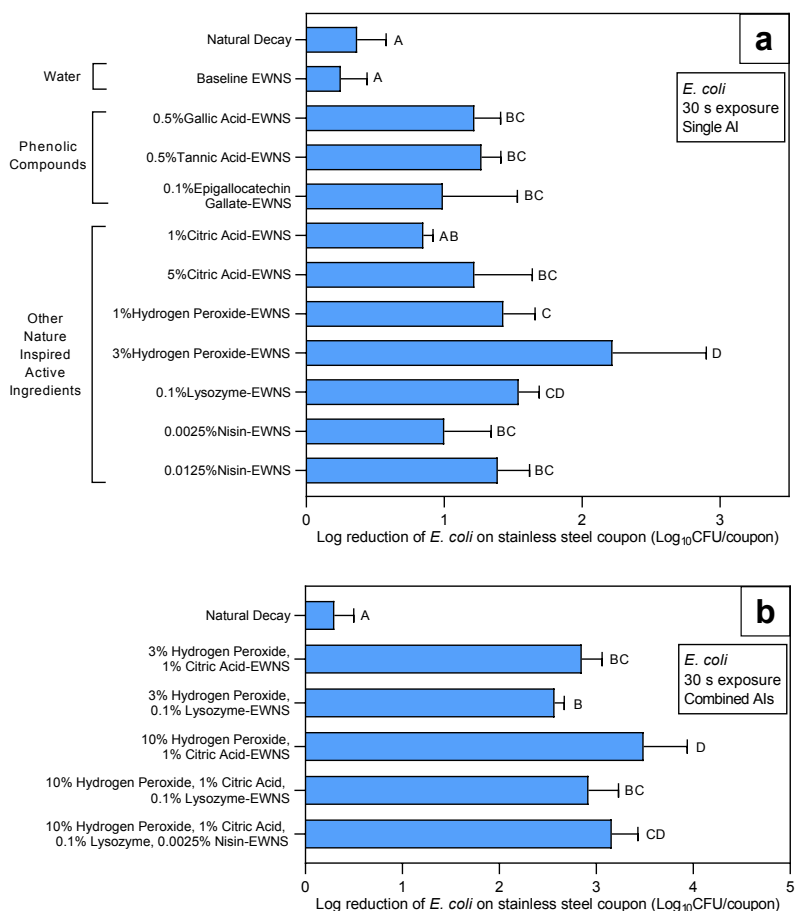

**Fig. S2 Inactivation of various microorganisms on stainless steel coupon from EWNS based nano-sanitizers synthesized with an AI cocktail:** (a): *Escherichia coli*, (b) *Listeria innocua*, (c) *Penicillium italicum* and (d) *Pseudomonas fluorescens*. Microorganisms were inoculated on stainless steel coupon and exposed to the EWNS based nano-sanitizers synthesized with a combination of AIs (10% hydrogen peroxide, 1% citric acid, 0.1% lysozyme and 0.0025% nisin). The coupon was inoculated with  $\sim 10^6$  CFU/coupon of *E. coli*,  $\sim 10^6$  CFU/coupon of *L. innocua*,  $\sim 10^6$  PFU/coupon of bacteriophage MS2,  $\sim 10^5$  CFU/coupon of *P. italicum* or  $\sim 10^6$  CFU/coupon of *Ps. fluorescens*. The coupons were then exposed to the EWNS based nano-sanitizers for 0 – 15 min as shown in Fig. 1. The temperature and relative humidity were  $\sim 24$  °C and  $\sim 40\%$ , respectively. The error bar represents 1 standard deviation.

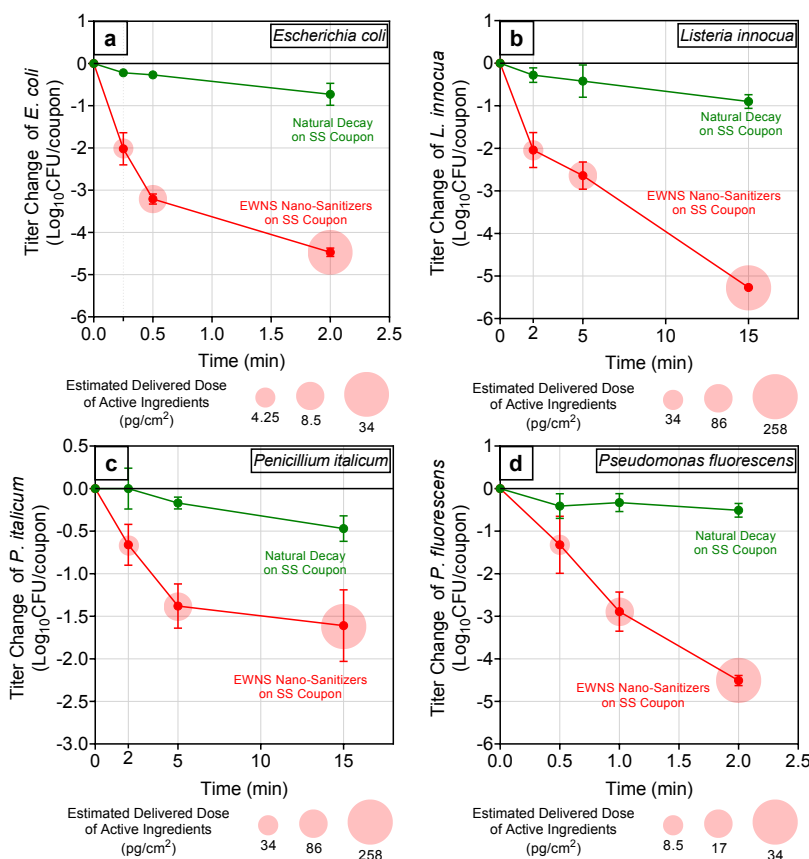

**Table S1. Physio-chemical characterization of the EWNS based nano-sanitizer synthesized with 10% hydrogen peroxide, 1% citric acid, 0.1% lysozyme and 0.0025% nisin.** (Adapted with permission from Huang, R., Vaze, N., Soorneedi, A., Moore, M. D., Xue, Y., Bello, D., & Demokritou, P. (2019). Inactivation of Hand Hygiene-Related Pathogens Using Engineered Water Nanostructures. ACS Sustainable Chemistry & Engineering, 7(24), 19761-19769.

Copyright 2019, American Chemical Society)

| <i>Physical Characterization</i>                                             |                                 |                                    |
|------------------------------------------------------------------------------|---------------------------------|------------------------------------|
| SMPS-measured mean diameter (nm)                                             |                                 | $21.0 \pm 2.6$                     |
| CPC-measured concentration (number of particles/cm <sup>3</sup> )            |                                 | $181090 \pm 45371$                 |
| Electric charge (e <sup>-</sup> /particle)                                   |                                 | $10.4 \pm 1.6$                     |
| <i>Chemical Characterization</i>                                             |                                 |                                    |
|                                                                              | Estimated Concentration         | Measured Concentration             |
| Short-lived ROS (mol H <sub>2</sub> O <sub>2</sub> equivalent unit/particle) | N/A                             | $1.88 \pm 0.72 \times 10^{-14}$    |
| Total ROS (mol H <sub>2</sub> O <sub>2</sub> equivalent unit/particle)       | N/A                             | $3.41 \pm 0.33 \times 10^{-14}$    |
| Citric acid (ng/particle)                                                    | $4.86 \pm 1.55 \times 10^{-11}$ | $< 2.47 \pm 0.41 \times 10^{-9} *$ |

N/A: Not applicable.

\*: 1 replicate was below the limit of detection out of a total of 3 replicates.

The detection limit of short-lived ROS and total ROS is  $1.38 \times 10^{-10}$  nmol H<sub>2</sub>O<sub>2</sub> equivalent unit/particle.

The detection limit of citric acid is  $1.84 \times 10^{-9}$  ng/particle.

#### **Details on the plaque assay utilized from Su and D'Souza:**

E. coli B-15597 was grown in TSB containing 0.1% glucose, 2 mM CaCl<sub>2</sub>, and 10 µg/ml thiamine for 6 h. MS2 treated with GSE or water after neutralization with TSB containing 3% beef extract was serially diluted in TSB, and 0.7 ml of diluted phage was mixed with 0.3 ml of 6-

h E. coli host. The 1-ml host-virus combination was then added to 8 ml of 0.6% molten top agar, mixed and poured on tryptic soy agar (TSA) bottom agar plates, and incubated at 37°C overnight before counting (Su & D'Souza, 2011).

## References:

Huang, R., Vaze, N., Soorneedi, A., Moore, M. D., Xue, Y., Bello, D., & Demokritou, P. (2019).

Inactivation of Hand Hygiene-Related Pathogens Using Engineered Water Nanostructures.

*ACS Sustainable Chemistry & Engineering*, 7(24), 19761–19769.

Vaze, N., Pyrgiotakis, G., Mena, L., Baumann, R., Demokritou, A., Ericsson, M., ... Demokritou,

P. (2019). A nano-carrier platform for the targeted delivery of nature-inspired

antimicrobials using Engineered Water Nanostructures for food safety applications. *Food*

*Control*, 96, 365–374.

Su, X., & D'Souza, D. H. (2011). Grape seed extract for control of human enteric viruses.

*Applied and Environmental Microbiology*, 77(12), 3982–3987.

<https://doi.org/10.1128/AEM.00193-11>
